# Supplementary material for: QTLs Detection for Low-Temperature Germination in Rapeseed by QTL-seq and Linkage Mapping Approach
Source: Research Square preprint supplement (doi:10.21203/rs.3.rs-923176/v1), 2021-10-14
Supplement: Supplementary file 1 [file 47e0d79a37c40b09d4787777.xlsx]

## Sheet: Sheet1
Table S2 Function variants effects related to the predicted genes in qLTGA9-1 and qLTGC1-1.
QTL	Chromosome	Position of mutation site	The base of Huyou21	The base of 3429	GeneID	Mutation type	Functional effect
qLTGA9-1	A09	44725714	T	A	chrA09g005475	upstream_gene_variant	MODIFIER
	A09	44729302	A	T	chrA09g005475-chrA09g005476	intergenic_region	MODIFIER
	A09	44748998	TTATATA	T	chrA09g005478	downstream_gene_variant	MODIFIER
	A09	44749119	T	TGA	chrA09g005479	splice_region_variant&intron_variant	LOW
	A09	44749999	G	A	chrA09g005479	synonymous_variant	LOW
	A09	44750018	G	T	chrA09g005479	splice_region_variant&intron_variant	LOW
	A09	44750019	C	T	chrA09g005479	splice_region_variant&intron_variant	LOW
	A09	44750041	C	T	chrA09g005478	downstream_gene_variant	MODIFIER
	A09	44750050	T	C	chrA09g005478	downstream_gene_variant	MODIFIER
	A09	44750052	A	T	chrA09g005478	downstream_gene_variant	MODIFIER
	A09	44750056	A	AT	chrA09g005478	downstream_gene_variant	MODIFIER
	A09	44750062	A	T	chrA09g005478	downstream_gene_variant	MODIFIER
	A09	44750079	T	A	chrA09g005478	downstream_gene_variant	MODIFIER
	A09	44750080	T	A	chrA09g005478	downstream_gene_variant	MODIFIER
	A09	44756046	T	G	chrA09g005480	upstream_gene_variant	MODIFIER
	A09	44756548	T	TAGACTAAGAAACTTCCACTATG	chrA09g005480	upstream_gene_variant	MODIFIER
	A09	44788715	A	T	chrA09g005489	upstream_gene_variant	MODIFIER
	A09	44789932	C	A	chrA09g005489	upstream_gene_variant	MODIFIER
	A09	44821604	C	A	chrA09g005495	downstream_gene_variant	MODIFIER
	A09	44821608	TTG	T	chrA09g005495	downstream_gene_variant	MODIFIER
	A09	44821618	T	A	chrA09g005495	downstream_gene_variant	MODIFIER
	A09	44824698	A	G	chrA09g005495	synonymous_variant	LOW
	A09	44824839	G	A	chrA09g005494	downstream_gene_variant	MODIFIER
	A09	44837326	T	G	chrA09g005498	synonymous_variant	LOW
	A09	44842617	C	T	chrA09g005501	5_prime_UTR_variant	MODIFIER
	A09	44843101	C	A	chrA09g005501	missense_variant	MODERATE
	A09	44843113	C	T	chrA09g005501	missense_variant	MODERATE
	A09	44843144	C	T	chrA09g005501	synonymous_variant	LOW
	A09	44845228	G	A	chrA09g005502	missense_variant	MODERATE
	A09	44845247	A	C	chrA09g005503	upstream_gene_variant	MODIFIER
	A09	44845567	AT	A	chrA09g005503	upstream_gene_variant	MODIFIER
	A09	44849931	T	A	chrA09g005502	upstream_gene_variant	MODIFIER
	A09	44850179	T	A	chrA09g005502	upstream_gene_variant	MODIFIER
	A09	44850270	T	C	chrA09g005502	upstream_gene_variant	MODIFIER
	A09	44850273	G	GGTT	chrA09g005502	upstream_gene_variant	MODIFIER
	A09	44850274	A	T	chrA09g005502	upstream_gene_variant	MODIFIER
	A09	44850276	A	T	chrA09g005502	upstream_gene_variant	MODIFIER
	A09	44854125	G	T	chrA09g005504	upstream_gene_variant	MODIFIER
	A09	44854354	G	A	chrA09g005504	upstream_gene_variant	MODIFIER
	A09	44854479	C	T	chrA09g005504	upstream_gene_variant	MODIFIER
	A09	44855863	CATACATTTTGAT	C	chrA09g005504	upstream_gene_variant	MODIFIER
	A09	44855883	C	G	chrA09g005504	upstream_gene_variant	MODIFIER
	A09	44858136	GAACACGAAAGA	G	chrA09g005504	upstream_gene_variant	MODIFIER
	A09	44858154	C	T	chrA09g005504	upstream_gene_variant	MODIFIER
	A09	44860421	G	A	chrA09g005506	synonymous_variant	LOW
	A09	44860544	A	G	chrA09g005506	synonymous_variant	LOW
	A09	44864396	T	C/A	chrA09g005507	missense_variant&splice_region_variant	MODERATE
	A09	44864404	G	T	chrA09g005507	synonymous_variant	LOW
	A09	44865819	T	C	chrA09g005506	upstream_gene_variant	MODIFIER
	A09	44865838	A	G	chrA09g005506	upstream_gene_variant	MODIFIER
	A09	44866036	A	AAT	chrA09g005506	upstream_gene_variant	MODIFIER
	A09	44867603	T	C	chrA09g005508	upstream_gene_variant	MODIFIER
	A09	44869570	T	A	chrA09g005509	synonymous_variant	LOW
	A09	44870517	A	ACT	chrA09g005509	frameshift_variant	HIGH
	A09	44870518	G	GAATGATCA	chrA09g005509	frameshift_variant	HIGH
	A09	44870576	T	TTC	chrA09g005509	frameshift_variant	HIGH
	A09	44886229	T	A	chrA09g005513	upstream_gene_variant	MODIFIER
	A09	44894916	G	A	chrA09g005514	3_prime_UTR_variant	MODIFIER
	A09	44925087	CTTG	C	chrA09g005521	upstream_gene_variant	MODIFIER
	A09	44925123	C	A	chrA09g005521	upstream_gene_variant	MODIFIER
	A09	44929536	C	G	chrA09g005521	intron_variant	MODIFIER
	A09	44929547	A	ATGATTT	chrA09g005521	intron_variant	MODIFIER
	A09	44929550	T	TATATTTTTAATATTATA	chrA09g005521	intron_variant	MODIFIER
	A09	44943484	A	G	chrA09g005522	upstream_gene_variant	MODIFIER
	A09	44947180	C	G	chrA09g005523	upstream_gene_variant	MODIFIER
	A09	44950560	G	A	chrA09g005523	synonymous_variant	LOW
	A09	44950611	T	C	chrA09g005523	synonymous_variant	LOW
	A09	44950640	TC	T	chrA09g005524	upstream_gene_variant	MODIFIER
	A09	44950643	T	G	chrA09g005524	upstream_gene_variant	MODIFIER
	A09	44950648	T	C	chrA09g005524	upstream_gene_variant	MODIFIER
	A09	44950651	T	C	chrA09g005524	upstream_gene_variant	MODIFIER
	A09	44950659	A	AAC	chrA09g005524	upstream_gene_variant	MODIFIER
	A09	44951412	T	TC	chrA09g005524	upstream_gene_variant	MODIFIER
	A09	44951414	A	T	chrA09g005524	upstream_gene_variant	MODIFIER
	A09	44951648	G	A	chrA09g005523	missense_variant	MODERATE
	A09	44956475	A	T	chrA09g005523	downstream_gene_variant	MODIFIER
	A09	44958598	G	T	chrA09g005524	missense_variant	MODERATE
	A09	44958600	C	A	chrA09g005524	missense_variant	MODERATE
	A09	44958874	G	GT	chrA09g005524	splice_region_variant&intron_variant	LOW
	A09	44958957	G	A	chrA09g005524	missense_variant	MODERATE
	A09	44964158	A	ATATTTAATTAGCATTTAGTTATAATCAACCAAGCCTAAAAACT	chrA09g005526	splice_region_variant&intron_variant	LOW
	A09	44965526	G	A	chrA09g005525	upstream_gene_variant	MODIFIER
	A09	44965529	C	T	chrA09g005525	upstream_gene_variant	MODIFIER
	A09	44977881	A	T	chrA09g005527	upstream_gene_variant	MODIFIER
	A09	44987132	G	T	chrA09g005528	upstream_gene_variant	MODIFIER
	A09	44987152	A	AT	chrA09g005528	upstream_gene_variant	MODIFIER
	A09	44988122	GA	G	chrA09g005528	upstream_gene_variant	MODIFIER
	A09	44997815	G	T	chrA09g005531	upstream_gene_variant	MODIFIER
	A09	44997816	A	G	chrA09g005531	upstream_gene_variant	MODIFIER
	A09	44997817	C	T	chrA09g005531	upstream_gene_variant	MODIFIER
	A09	45006449	T	A	chrA09g005532	downstream_gene_variant	MODIFIER
	A09	45021586	TC	T	chrA09g005535	upstream_gene_variant	MODIFIER
	A09	45023696	G	C	chrA09g005534	upstream_gene_variant	MODIFIER
	A09	45028101	A	G	chrA09g005534	upstream_gene_variant	MODIFIER
	A09	45055937	T	TCAAAAACAC	chrA09g005540	3_prime_UTR_variant	MODIFIER
	A09	45056829	G	A	chrA09g005540	5_prime_UTR_variant	MODIFIER
	A09	45057218	T	G	chrA09g005540	upstream_gene_variant	MODIFIER
	A09	45057220	G	A	chrA09g005540	upstream_gene_variant	MODIFIER
	A09	45060826	A	T	chrA09g005540	upstream_gene_variant	MODIFIER
qLTGC1-1	C01	48581745	A	G	chrC01g004356	upstream_gene_variant	MODIFIER
	C01	48581783	T	C	chrC01g004356	upstream_gene_variant	MODIFIER
	C01	48581789	G	A	chrC01g004356	upstream_gene_variant	MODIFIER
	C01	48581797	A	T	chrC01g004356	upstream_gene_variant	MODIFIER
	C01	48582452	C	A	chrC01g004356	upstream_gene_variant	MODIFIER
	C01	48591406	A	G	chrC01g004358	downstream_gene_variant	MODIFIER
	C01	48593949	T	A	chrC01g004357	missense_variant	MODERATE
	C01	48593963	G	A	chrC01g004357	missense_variant	MODERATE
	C01	48596639	G	T	chrC01g004359	missense_variant	MODERATE
	C01	48597324	C	A	chrC01g004359	missense_variant	MODERATE
	C01	48597423	A	T	chrC01g004358	upstream_gene_variant	MODIFIER
	C01	48597437	T	G	chrC01g004359	splice_region_variant&intron_variant	LOW
	C01	48597518	A	C	chrC01g004358	upstream_gene_variant	MODIFIER
	C01	48598694	A	T	chrC01g004358	upstream_gene_variant	MODIFIER
	C01	48598695	GA	G	chrC01g004358	upstream_gene_variant	MODIFIER
	C01	48598697	A	G	chrC01g004358	upstream_gene_variant	MODIFIER
	C01	48598706	G	C	chrC01g004358	upstream_gene_variant	MODIFIER
	C01	48598738	A	G	chrC01g004358	upstream_gene_variant	MODIFIER
	C01	48599149	A	C	chrC01g004358	upstream_gene_variant	MODIFIER
	C01	48602833	G	A	chrC01g004360	synonymous_variant	LOW
	C01	48675934	T	A	chrC01g004367	upstream_gene_variant	MODIFIER
	C01	48675963	C	T	chrC01g004367	upstream_gene_variant	MODIFIER
	C01	48683135	T	T/C	chrC01g004369-chrC01g004370	intergenic_region	MODIFIER
	C01	48683136	G	G/A	chrC01g004369-chrC01g004370	intergenic_region	MODIFIER
	C01	48688398	C	A	chrC01g004370	upstream_gene_variant	MODIFIER
	C01	48690224	GT	G	chrC01g004370	upstream_gene_variant	MODIFIER
	C01	48691182	G	GT	chrC01g004370	upstream_gene_variant	MODIFIER
	C01	48691183	A	C	chrC01g004370	upstream_gene_variant	MODIFIER
	C01	48691240	A	G	chrC01g004370	upstream_gene_variant	MODIFIER
	C01	48693198	C	A	chrC01g004370	downstream_gene_variant	MODIFIER
	C01	48693199	T	G	chrC01g004370	downstream_gene_variant	MODIFIER
	C01	48694436	T	A	chrC01g004370	downstream_gene_variant	MODIFIER
	C01	48694443	C	A	chrC01g004370	downstream_gene_variant	MODIFIER
	C01	48694459	T	TA	chrC01g004370	downstream_gene_variant	MODIFIER
	C01	48694552	G	A	chrC01g004370	downstream_gene_variant	MODIFIER
	C01	48698300	A	T	chrC01g004371	upstream_gene_variant	MODIFIER
	C01	48698301	A	T	chrC01g004371	upstream_gene_variant	MODIFIER
	C01	48702415	A	G	chrC01g004371	upstream_gene_variant	MODIFIER
	C01	48706515	A	T	chrC01g004373	upstream_gene_variant	MODIFIER
	C01	48710527	C	A	chrC01g004372	upstream_gene_variant	MODIFIER
	C01	48722392	C	A	chrC01g004373-chrC01g004374	intergenic_region	MODIFIER
	C01	48724598	A	G	chrC01g004373-chrC01g004374	intergenic_region	MODIFIER
	C01	48726471	C	T	chrC01g004373-chrC01g004374	intergenic_region	MODIFIER
	C01	48726500	T	G	chrC01g004373-chrC01g004374	intergenic_region	MODIFIER
	C01	48726782	A	G	chrC01g004373-chrC01g004374	intergenic_region	MODIFIER
	C01	48726829	T	G	chrC01g004373-chrC01g004374	intergenic_region	MODIFIER
	C01	48726834	G	A	chrC01g004373-chrC01g004374	intergenic_region	MODIFIER
	C01	48726837	G	A	chrC01g004373-chrC01g004374	intergenic_region	MODIFIER
	C01	48726870	G	A	chrC01g004373-chrC01g004374	intergenic_region	MODIFIER
	C01	48728559	A	T	chrC01g004373-chrC01g004374	intergenic_region	MODIFIER
	C01	48728560	A	C	chrC01g004373-chrC01g004374	intergenic_region	MODIFIER
	C01	48728573	G	A	chrC01g004373-chrC01g004374	intergenic_region	MODIFIER
	C01	48729972	C	A	chrC01g004373-chrC01g004374	intergenic_region	MODIFIER
	C01	48730026	G	C	chrC01g004373-chrC01g004374	intergenic_region	MODIFIER
	C01	48730054	C	T	chrC01g004373-chrC01g004374	intergenic_region	MODIFIER
	C01	48730062	T	C	chrC01g004373-chrC01g004374	intergenic_region	MODIFIER
	C01	48730080	C	A	chrC01g004373-chrC01g004374	intergenic_region	MODIFIER
	C01	48730728	C	G	chrC01g004373-chrC01g004374	intergenic_region	MODIFIER
	C01	48731414	A	C	chrC01g004373-chrC01g004374	intergenic_region	MODIFIER
	C01	48731425	C	T	chrC01g004373-chrC01g004374	intergenic_region	MODIFIER
	C01	48733087	A	G	chrC01g004373-chrC01g004374	intergenic_region	MODIFIER
	C01	48733099	C	T	chrC01g004373-chrC01g004374	intergenic_region	MODIFIER
	C01	48733288	G	A	chrC01g004373-chrC01g004374	intergenic_region	MODIFIER
	C01	48733313	T	C	chrC01g004373-chrC01g004374	intergenic_region	MODIFIER
	C01	48737898	C	T	chrC01g004374	upstream_gene_variant	MODIFIER
	C01	48738369	T	C	chrC01g004374	upstream_gene_variant	MODIFIER
	C01	48739102	C	T	chrC01g004374	upstream_gene_variant	MODIFIER
	C01	48776749	TGGTTCTCGAAATGTTAAGACATCA	T	chrC01g004380	upstream_gene_variant	MODIFIER
	C01	48964805	A	C	chrC01g004389	upstream_gene_variant	MODIFIER
	C01	48980685	C	T	chrC01g004390	upstream_gene_variant	MODIFIER
	C01	48985814	A	AGGGTTAGGTGAGATTGGGTTTTCGAACTTATCGTCATTAGTTTTTTATTCT	chrC01g004393	upstream_gene_variant	MODIFIER
	C01	48990922	C	CT	chrC01g004395	upstream_gene_variant	MODIFIER
	C01	48990960	G	A	chrC01g004395	upstream_gene_variant	MODIFIER
	C01	48991068	CT	C	chrC01g004395	upstream_gene_variant	MODIFIER
	C01	48997407	T	C	chrC01g004395-chrC01g004396	intergenic_region	MODIFIER
	C01	48997580	T	C	chrC01g004395-chrC01g004396	intergenic_region	MODIFIER
	C01	49007058	G	T	chrC01g004396	intron_variant	MODIFIER
	C01	49007679	A	C	chrC01g004396	intron_variant	MODIFIER
	C01	49008909	A	C	chrC01g004396	downstream_gene_variant	MODIFIER
	C01	49014161	T	C	chrC01g004396-chrC01g004397	intergenic_region	MODIFIER
	C01	49015675	A	C	chrC01g004396-chrC01g004397	intergenic_region	MODIFIER
	C01	49016614	G	T	chrC01g004396-chrC01g004397	intergenic_region	MODIFIER
	C01	49018372	TG	T	chrC01g004396-chrC01g004397	intergenic_region	MODIFIER
	C01	49020692	G	A	chrC01g004396-chrC01g004397	intergenic_region	MODIFIER
	C01	49020885	T	A	chrC01g004396-chrC01g004397	intergenic_region	MODIFIER
	C01	49021105	T	A	chrC01g004396-chrC01g004397	intergenic_region	MODIFIER
	C01	49024325	AT	ATTTT	chrC01g004397	upstream_gene_variant	MODIFIER
	C01	49026445	C	T	chrC01g004397	upstream_gene_variant	MODIFIER
	C01	49038207	G	A	chrC01g004397-chrC01g004398	intergenic_region	MODIFIER
	C01	49038859	T	C	chrC01g004397-chrC01g004398	intergenic_region	MODIFIER
	C01	49047923	C	T	chrC01g004397-chrC01g004398	intergenic_region	MODIFIER
	C01	49050695	A	G	chrC01g004397-chrC01g004398	intergenic_region	MODIFIER
	C01	49050766	T	T/A	chrC01g004397-chrC01g004398	intergenic_region	MODIFIER
	C01	49052162	GT	G	chrC01g004398	upstream_gene_variant	MODIFIER
	C01	49052195	A	G	chrC01g004398	upstream_gene_variant	MODIFIER
	C01	49055222	AT	A	chrC01g004398	upstream_gene_variant	MODIFIER
	C01	49060711	A	G	chrC01g004398	downstream_gene_variant	MODIFIER
	C01	49068422	AT	A	chrC01g004399	upstream_gene_variant	MODIFIER
	C01	49068428	G	A	chrC01g004399	upstream_gene_variant	MODIFIER
	C01	49077473	A	G	chrC01g004400	upstream_gene_variant	MODIFIER
	C01	49077489	C	T	chrC01g004400	upstream_gene_variant	MODIFIER
	C01	49082732	C	T	chrC01g004400	missense_variant	MODERATE
	C01	49082807	G	A	chrC01g004400	downstream_gene_variant	MODIFIER
	C01	49084249	T	C	chrC01g004400	downstream_gene_variant	MODIFIER
	C01	49084390	T	TA	chrC01g004400	downstream_gene_variant	MODIFIER
	C01	49084409	A	G	chrC01g004400	downstream_gene_variant	MODIFIER
	C01	49092369	ATTTT	A	chrC01g004400-chrC01g004401	intergenic_region	MODIFIER
	C01	49092376	T	TAAAA	chrC01g004400-chrC01g004401	intergenic_region	MODIFIER
	C01	49092398	G	C	chrC01g004400-chrC01g004401	intergenic_region	MODIFIER
	C01	49093936	T	C	chrC01g004400-chrC01g004401	intergenic_region	MODIFIER
	C01	49093985	C	A	chrC01g004400-chrC01g004401	intergenic_region	MODIFIER
	C01	49094046	G	C	chrC01g004400-chrC01g004401	intergenic_region	MODIFIER
	C01	49094886	C	A	chrC01g004400-chrC01g004401	intergenic_region	MODIFIER
	C01	49099328	T	G	chrC01g004401	upstream_gene_variant	MODIFIER
	C01	49099800	C	T	chrC01g004401	upstream_gene_variant	MODIFIER
	C01	49100826	A	G	chrC01g004401	upstream_gene_variant	MODIFIER
	C01	49102292	G	A	chrC01g004401	upstream_gene_variant	MODIFIER
	C01	49102864	A	C	chrC01g004401	upstream_gene_variant	MODIFIER
	C01	49104053	T	TA	chrC01g004401	downstream_gene_variant	MODIFIER
	C01	49110765	G	A	chrC01g004401-chrC01g004402	intergenic_region	MODIFIER
	C01	49112639	T	A	chrC01g004401-chrC01g004402	intergenic_region	MODIFIER
	C01	49119847	G	T	chrC01g004401-chrC01g004402	intergenic_region	MODIFIER
	C01	49121357	C	T	chrC01g004401-chrC01g004402	intergenic_region	MODIFIER
	C01	49121877	A	G	chrC01g004402	upstream_gene_variant	MODIFIER
	C01	49127149	C	T	chrC01g004402	downstream_gene_variant	MODIFIER
	C01	49144001	C	A	chrC01g004403	upstream_gene_variant	MODIFIER
	C01	49147710	G	A	chrC01g004403-chrC01g004404	intergenic_region	MODIFIER
	C01	49151537	AT	A	chrC01g004403-chrC01g004404	intergenic_region	MODIFIER
	C01	49152352	G	A	chrC01g004403-chrC01g004404	intergenic_region	MODIFIER
	C01	49166356	T	A	chrC01g004405	missense_variant	MODERATE
	C01	49166516	G	T	chrC01g004405	missense_variant	MODERATE
	C01	49166868	C	T	chrC01g004405	upstream_gene_variant	MODIFIER
	C01	49166980	T	TGA	chrC01g004405	upstream_gene_variant	MODIFIER
	C01	49167446	C	G	chrC01g004405	upstream_gene_variant	MODIFIER
	C01	49171172	C	T	chrC01g004405	upstream_gene_variant	MODIFIER
	C01	49171195	T	G	chrC01g004405	upstream_gene_variant	MODIFIER
	C01	49175650	A	G	chrC01g004405-chrC01g004406	intergenic_region	MODIFIER
	C01	49176074	A	G	chrC01g004405-chrC01g004406	intergenic_region	MODIFIER
	C01	49176465	T	C	chrC01g004405-chrC01g004406	intergenic_region	MODIFIER
	C01	49185350	A/G	G	chrC01g004405-chrC01g004406	intergenic_region	MODIFIER
	C01	49185677	A	G	chrC01g004405-chrC01g004406	intergenic_region	MODIFIER
	C01	49185727	T	T/C	chrC01g004405-chrC01g004406	intergenic_region	MODIFIER
	C01	49188139	G	A	chrC01g004405-chrC01g004406	intergenic_region	MODIFIER
	C01	49193585	T	G	chrC01g004406	missense_variant	MODERATE
	C01	49200554	A	G	chrC01g004407	synonymous_variant	LOW
	C01	49200966	C	C/T	chrC01g004407	5_prime_UTR_variant	MODIFIER
	C01	49201560	T	G	chrC01g004407	upstream_gene_variant	MODIFIER
	C01	49201564	T	C	chrC01g004407	upstream_gene_variant	MODIFIER
	C01	49202410	T	A	chrC01g004407	upstream_gene_variant	MODIFIER
	C01	49207475	C	T	chrC01g004408	upstream_gene_variant	MODIFIER
	C01	49207491	C	T	chrC01g004408	upstream_gene_variant	MODIFIER
	C01	49207528	C	G	chrC01g004408	upstream_gene_variant	MODIFIER
	C01	49212286	A	G	chrC01g004409	upstream_gene_variant	MODIFIER
	C01	49217623	C	A	chrC01g004409	downstream_gene_variant	MODIFIER
	C01	49228519	A	C	chrC01g004409-chrC01g004410	intergenic_region	MODIFIER
	C01	49228566	A	G	chrC01g004409-chrC01g004410	intergenic_region	MODIFIER
	C01	49228576	G	T	chrC01g004409-chrC01g004410	intergenic_region	MODIFIER
	C01	49228588	A	G	chrC01g004409-chrC01g004410	intergenic_region	MODIFIER
	C01	49228821	G	A	chrC01g004409-chrC01g004410	intergenic_region	MODIFIER
	C01	49229190	A	G	chrC01g004409-chrC01g004410	intergenic_region	MODIFIER
	C01	49229244	CA	C	chrC01g004409-chrC01g004410	intergenic_region	MODIFIER
	C01	49229259	T	C	chrC01g004409-chrC01g004410	intergenic_region	MODIFIER
	C01	49230476	C	T	chrC01g004409-chrC01g004410	intergenic_region	MODIFIER
	C01	49239332	G	A	chrC01g004409-chrC01g004410	intergenic_region	MODIFIER
	C01	49239559	A	G	chrC01g004409-chrC01g004410	intergenic_region	MODIFIER
	C01	49239819	A	T	chrC01g004409-chrC01g004410	intergenic_region	MODIFIER
	C01	49257001	CT	C	chrC01g004410	upstream_gene_variant	MODIFIER
	C01	49257061	G	C	chrC01g004410	upstream_gene_variant	MODIFIER
	C01	49274139	A	C	chrC01g004411-chrC01g004412	intergenic_region	MODIFIER
	C01	49274193	A	T	chrC01g004411-chrC01g004412	intergenic_region	MODIFIER
	C01	49274204	T	TATAC	chrC01g004411-chrC01g004412	intergenic_region	MODIFIER
	C01	49274232	A	T	chrC01g004411-chrC01g004412	intergenic_region	MODIFIER
	C01	49274244	T	A	chrC01g004411-chrC01g004412	intergenic_region	MODIFIER
	C01	49274245	T	A	chrC01g004411-chrC01g004412	intergenic_region	MODIFIER
	C01	49274252	A	AG	chrC01g004411-chrC01g004412	intergenic_region	MODIFIER
	C01	49310544	T	G	chrC01g004414	upstream_gene_variant	MODIFIER
	C01	49310550	T	A	chrC01g004414	upstream_gene_variant	MODIFIER
	C01	49310636	G	A	chrC01g004414	upstream_gene_variant	MODIFIER
	C01	49310647	T	C	chrC01g004414	upstream_gene_variant	MODIFIER
	C01	49312896	A	G	chrC01g004414	downstream_gene_variant	MODIFIER
	C01	49312936	T	G	chrC01g004414	downstream_gene_variant	MODIFIER
	C01	49312937	A	T	chrC01g004414	downstream_gene_variant	MODIFIER
	C01	49313012	G	C	chrC01g004414	downstream_gene_variant	MODIFIER
	C01	49313019	T	TAGTAC	chrC01g004414	downstream_gene_variant	MODIFIER
	C01	49313159	C	T	chrC01g004414	downstream_gene_variant	MODIFIER
	C01	49313318	T	TTATA	chrC01g004414	downstream_gene_variant	MODIFIER
	C01	49313383	C	CA	chrC01g004414	downstream_gene_variant	MODIFIER
	C01	49313431	T	A	chrC01g004414	downstream_gene_variant	MODIFIER
