# Supplementary material for: QTLs Detection for Low-Temperature Germination in Rapeseed by QTL-seq and Linkage Mapping Approach
Source: Research Square preprint supplement (doi:10.21203/rs.3.rs-923176/v1), 2021-10-14
Supplement: Supplementary file 2 [file c03cffd50f7c2fe625bd75ca.xlsx]

## Sheet: Sheet1
Table S3 Segregation ratio of LTG for the 3429 × Huyou21 rapeseed population.
	Germination seed number under 8℃	Un-germination seed number under 8℃	Germination seed number under 20℃（Total）	Expect ratio	c2	P value
Huyou21	955	66	1021	-	-	-
3429	210	758	968	-	-	-
Huyou21/3429 F1	120	51	171	-	-	-
3429/Huyou21 F1	90	27	117	-	-	-
3429/Huyou21 F2	420	57	477	7:1	0.04	0.83
